# Supplementary material for: Rapid biodegradation of microplastics generated from bio-based thermoplastic polyurethane
Source: Springer Nature journal article supplement (doi:10.1038/s41598-024-56492-6), 2024-03-12
Supplement: 41598_2024_56492_MOESM1_ESM.pdf [file 41598_2024_56492_MOESM1_ESM.pdf]

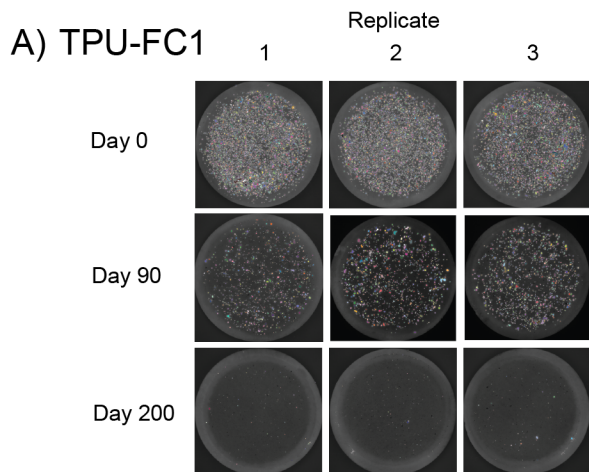

|         | TPU-FC1 |
|---------|---------|
| Day 0   | 3536    |
| Day 0   | 4203    |
| Day 0   | 4925    |
| Day 90  | 1457    |
| Day 90  | 1126    |
| Day 90  | 1473    |
| Day 200 | 151     |
| Day 200 | 157     |
| Day 200 | 96      |

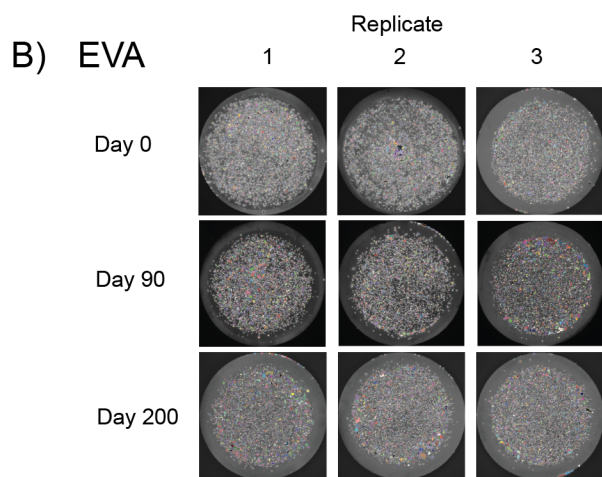

|         | EVA  |
|---------|------|
| Day 0   | 4339 |
| Day 0   | 5750 |
| Day 0   | 4712 |
| Day 90  | 4053 |
| Day 90  | 4731 |
| Day 90  | 4656 |
| Day 200 | 4578 |
| Day 200 | 4855 |
| Day 200 | 3779 |

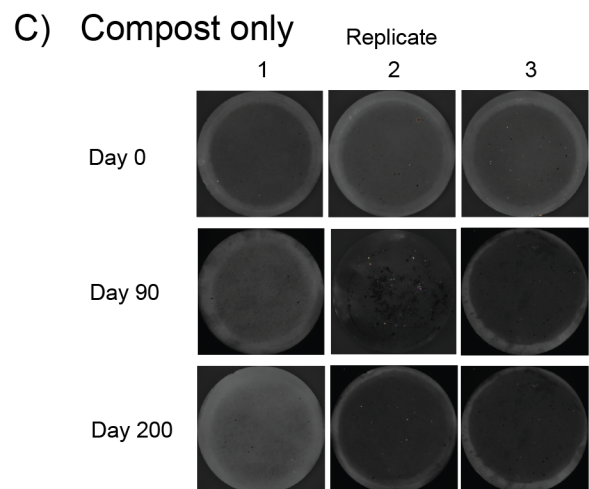

|         | compost only |
|---------|--------------|
| Day 0   | 51           |
| Day 0   | 23           |
| Day 0   | 81           |
| Day 90  | 7            |
| Day 90  | 68           |
| Day 90  | 6            |
| Day 200 | 9            |
| Day 200 | 19           |
| Day 200 | 5            |

Supplemental Figure 1- Full scale images of all microplastic extraction filters. Tables to the left are particle counts of quantified microplastics generated in ImageJ. (A) Filters from TPU-FC1 at the indicated times/replicates. (B) Filters from the EVA samples at the indicated times/replicates. (C) Compost only control filters at the indicated times/replicates.

**A**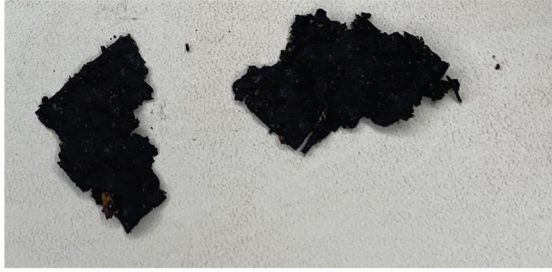**B**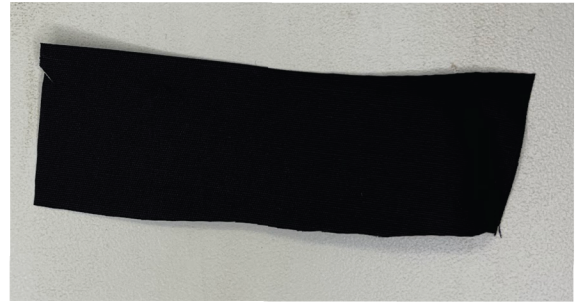**C**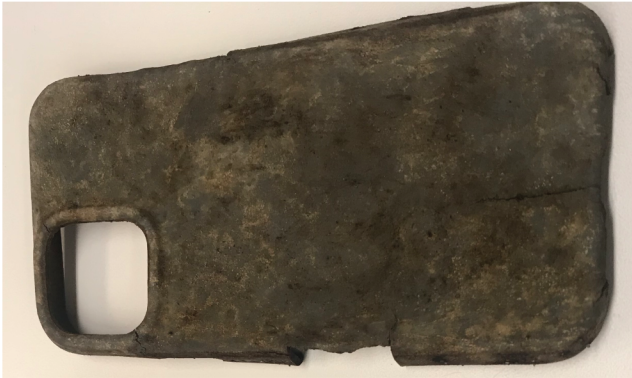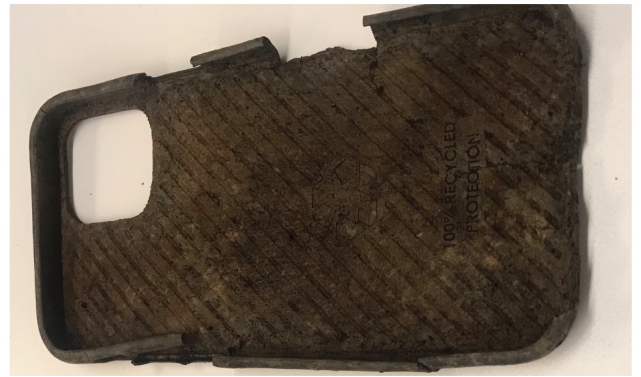**D**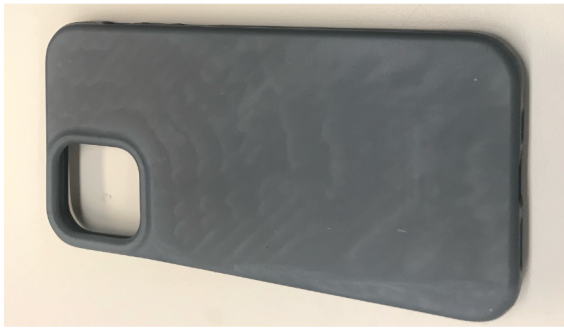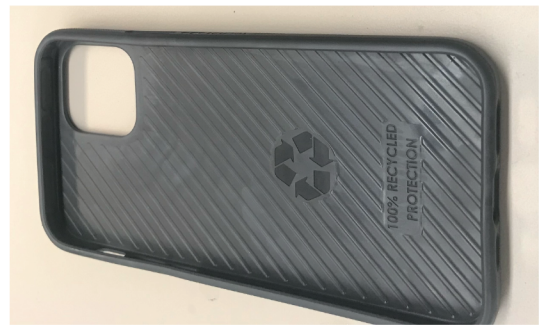

Supplemental Figure 2- Biodegradation of various prototype products made from bio-based TPU materials. (A) TPU-coated fabric after 2wk in compost conditions. (B) Control sample of TPU-coated fabric that was not exposed to compost after 2wk. (C) Injection molded TPU phone case after one year in compost. (D) Control images of TPU phone case not exposed to compost.
